# Supplementary material for: Volatile profiling reveals intracellular metabolic changes in Aspergillus parasiticus: veA regulates branched chain amino acid and ethanol metabolism
Source: Springer Nature journal article supplement (doi:10.1186/1471-2091-11-33), 2010-01-01
Supplement: Additional file 7 [file 1471-2091-11-33-s7.pdf]

ADH1 MSIPETQKGVIFYESHGKLEHKDIPVVPKPKANELLINVKYSGVCHTDLHAWHGDWPLPVK 60  
AFLA\_048690 MSIPEMQWAQVAEQKGGPLIYKQIPVVPKPGPDEILVKVRYSGVCHTDLHALKGDWPLPVK 60  
\*\*\*\*\* \* \* \* \* \* \* \* \* \* \* \* \* \* \* \* \* \* \* \* \* \* \* \* \* \* \* \* \* \*

ADH1 LPLVGGHEGAGVVVGMGENVKGWKIGDYAGIKWLNGSCMACEYCELGNESNCPHADLSGY 120  
AFLA\_048690 MPLVGGHEGAGVVVARGDLVTEFEIGDHAGLKWLNGSCLACEFCKQADEPLCPNASLSGY 120  
\*\*\*\*\* \* \* \* \* \* \* \* \* \* \* \* \* \* \* \* \* \* \* \* \* \* \* \* \* \* \* \* \* \*

ADH1 THDGSFQQYATADAVQAAHIPQGTDLAQVAPILCAGITVYKALKSANLMAGHWVAISGAA 180  
AFLA\_048690 TVDGTFFQQYAIGKATHASKLPKNVPLDAVAPVLCAGITVYKGLKESGVRPGQTVVAIVGAG 180  
\* \* \* \* \* \* \* \* \* \* \* \* \* \* \* \* \* \* \* \* \* \* \* \* \* \* \* \* \*

ADH1 GGLGSLAVQYAKAMGYRVLGIDGGEGKEELFRSIGGEVFIDFTKEKDIVGAVLKATDG-- 238  
AFLA\_048690 GGLGSLALQYAKAMGIRVVAIDGGEEKQAMCEQLGAEAYVDFTKTQDLVADVKAATPEGL 240  
\*\*\*\*\* \* \* \* \* \* \* \* \* \* \* \* \* \* \* \* \* \* \* \* \* \* \* \* \* \* \* \* \* \*

ADH1 GAHGVINVSVSEAAIEASTRYVRANGTTVLVGMPAGAKCCSDVFNQVVKSIISIVGSYVGN 298  
AFLA\_048690 GAHAVILLAVAEKPFQQAAEYVRSRGTVVAIGLPAGAFRLRAPVFNTVVRMINIKGSYVGN 300  
\* \* \* \* \* \* \* \* \* \* \* \* \* \* \* \* \* \* \* \* \* \* \* \* \* \* \* \* \*

ADH1 RADTREALDFFARGLVKSPIKVVGLSTLPEIYEKMEKGQIVGRYVVDTSK 348  
AFLA\_048690 RQDGVEAVDFFARGLIKAPFKTAPLQDLPKIFELMEQGKIAGRYVLEIPE 350  
\* \* \* \* \* \* \* \* \* \* \* \* \* \* \* \* \* \* \* \* \* \* \* \* \* \* \* \* \*
